# Supplementary material for: Macrophages and β-cells are responsible for CXCR2-mediated neutrophil infiltration of the pancreas during autoimmune diabetes
Source: PubMed Central journal article supplement (PMC4154135; doi:10.15252/emmm.201404144), 2014-06-26
Supplement: emmm0006-1090-sd3.pdf [file emmm0006-1090-sd3.pdf]

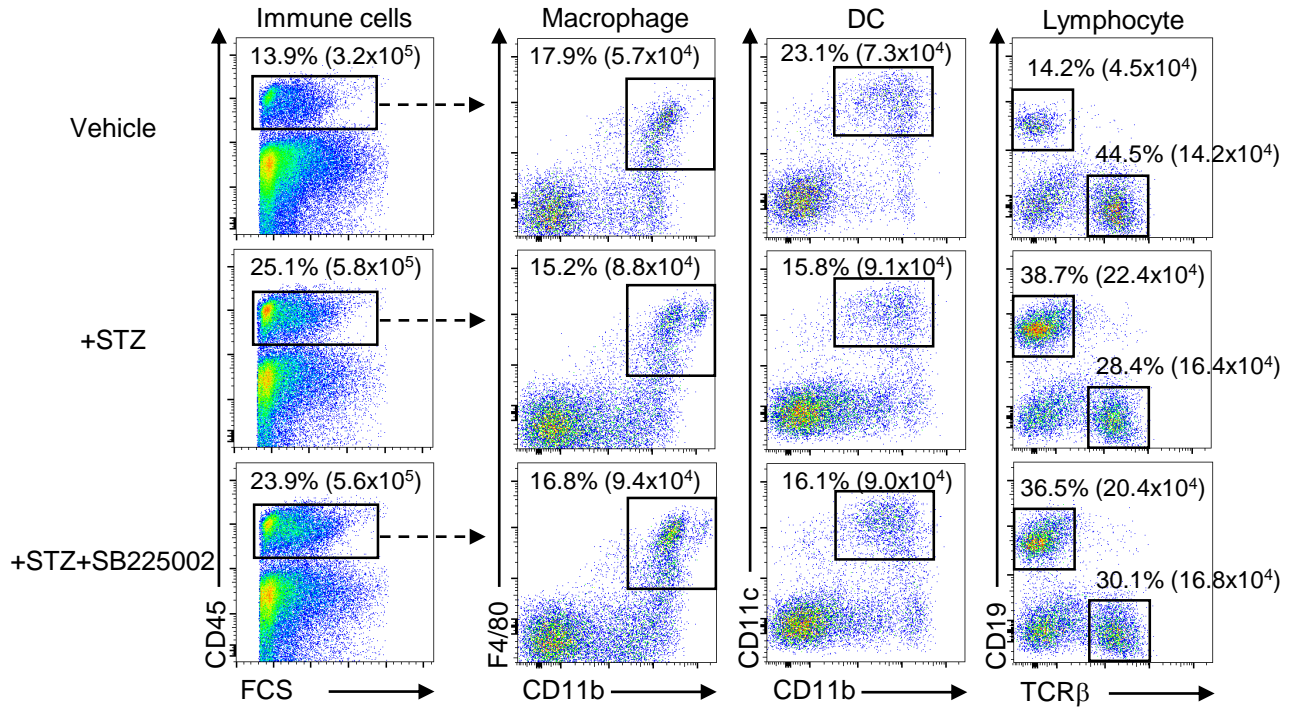

**Figure S3. Population of infiltrating cells in the pancreatic islets of NOD mice after streptozotocin and SB225002 treatments.** Pancreatic islet cells from 6-wk-old NOD mice were recovered 12h after STZ injection (i.p. 80mg/kg) and infiltrating cells were analyzed by flow cytometry. Percentage and absolute number (in brackets) of each population is represented. Data are representative of 2 independent experiments each with 2 pooled mice per group.
