# Supplementary material for: Macrophages and β-cells are responsible for CXCR2-mediated neutrophil infiltration of the pancreas during autoimmune diabetes
Source: PubMed Central journal article supplement (PMC4154135; doi:10.15252/emmm.201404144), 2014-06-26
Supplement: emmm0006-1090-sd4.pdf [file emmm0006-1090-sd4.pdf]

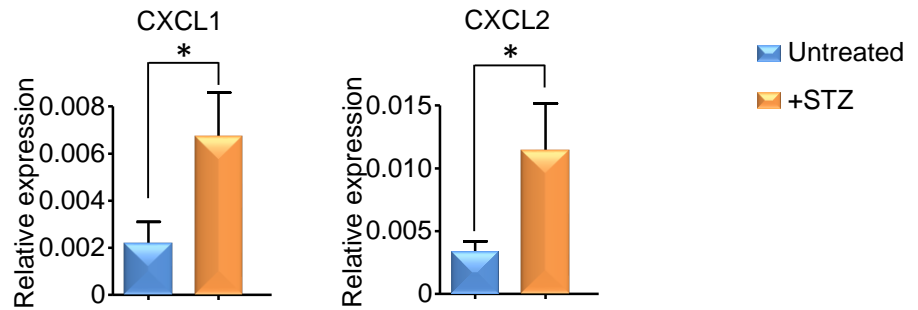

**Figure S4. mRNA expression of chemokines in pancreatic islets treated by streptozotocin.**

Pancreatic islets pooled from independent NOD scid mice were handpicked and cultured overnight to ensure the release of potential infiltrating immune cells. Then islets were handpicked a second time and separated in two groups: one treated with the vehicle and the other one with streptozotocin (STZ, 0.5 mg/mL). Both islet preparations were cultured for six additional hours and then recovered for analysis. The mRNA expression of chemokine genes were analyzed by quantitative-PCR. Data were normalized to gapdh housekeeping gene. Data are Data are median  $\pm$  interquartile range (scatter plot) from two independent experiments with two independent mice for each group. \*:  $P < 0.05$ .
