# Supplementary material for: Macrophages and β-cells are responsible for CXCR2-mediated neutrophil infiltration of the pancreas during autoimmune diabetes
Source: PubMed Central journal article supplement (PMC4154135; doi:10.15252/emmm.201404144), 2014-06-26
Supplement: emmm0006-1090-sd6.pdf [file emmm0006-1090-sd6.pdf]

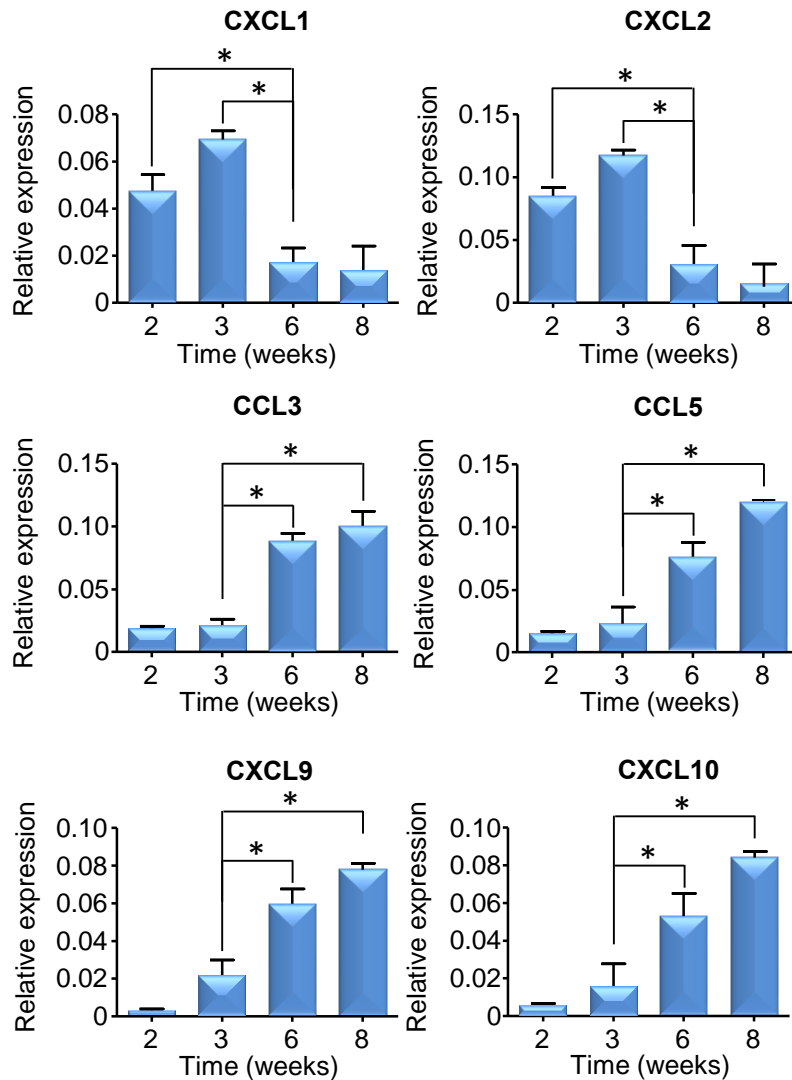

**Figure S6. mRNA expression of CCR1 ligands in the pancreatic islets of NOD mice at various ages.** Purified pancreatic islets were collected in RLT buffer with 1% of  $\beta$ -mercaptoethanol. mRNA was isolated using RNeasy Mini Kit (Qiagen) and reverse transcribed with Superscript III (Roche). Quantitative-PCR was performed with SYBR Green and analyzed on a LightCycler 480 for the expression of chemokine genes. Data were normalized to *gapdh* housekeeping gene. Data are mean values  $\pm$  SEM (scatter plot) from three independent experiments with four independent mice for each group. \*:  $P < 0.05$ .
