# Supplementary material for: Macrophages and β-cells are responsible for CXCR2-mediated neutrophil infiltration of the pancreas during autoimmune diabetes
Source: PubMed Central journal article supplement (PMC4154135; doi:10.15252/emmm.201404144), 2014-06-26
Supplement: emmm0006-1090-sd7.pdf [file emmm0006-1090-sd7.pdf]

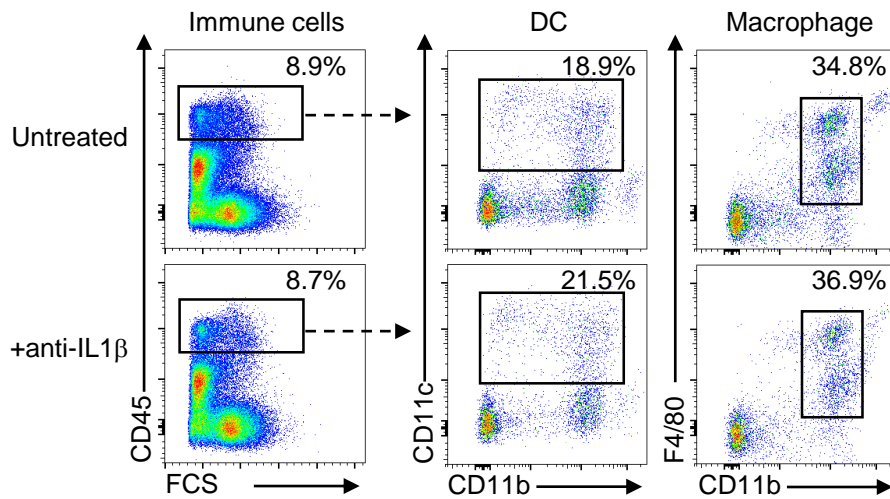

**Figure S7. Population of infiltrating cells in the pancreatic islets of 3-wk-old NOD mice after anti-IL1 $\beta$  treatment.** NOD mice were treated between 10 and 20 days of age (4 injections of anti-IL1 $\beta$  mAb, 200  $\mu$ g/mouse/injection). Pancreatic islet cells were recovered and analyzed by flow cytometry. Percentage of each population is represented after gating on CD45<sup>+</sup> cells. Data are representative of 3 independent experiments.
