# Supplementary material for: Macrophages and β-cells are responsible for CXCR2-mediated neutrophil infiltration of the pancreas during autoimmune diabetes
Source: PubMed Central journal article supplement (PMC4154135; doi:10.15252/emmm.201404144), 2014-06-26
Supplement: emmm0006-1090-sd8.pdf [file emmm0006-1090-sd8.pdf]

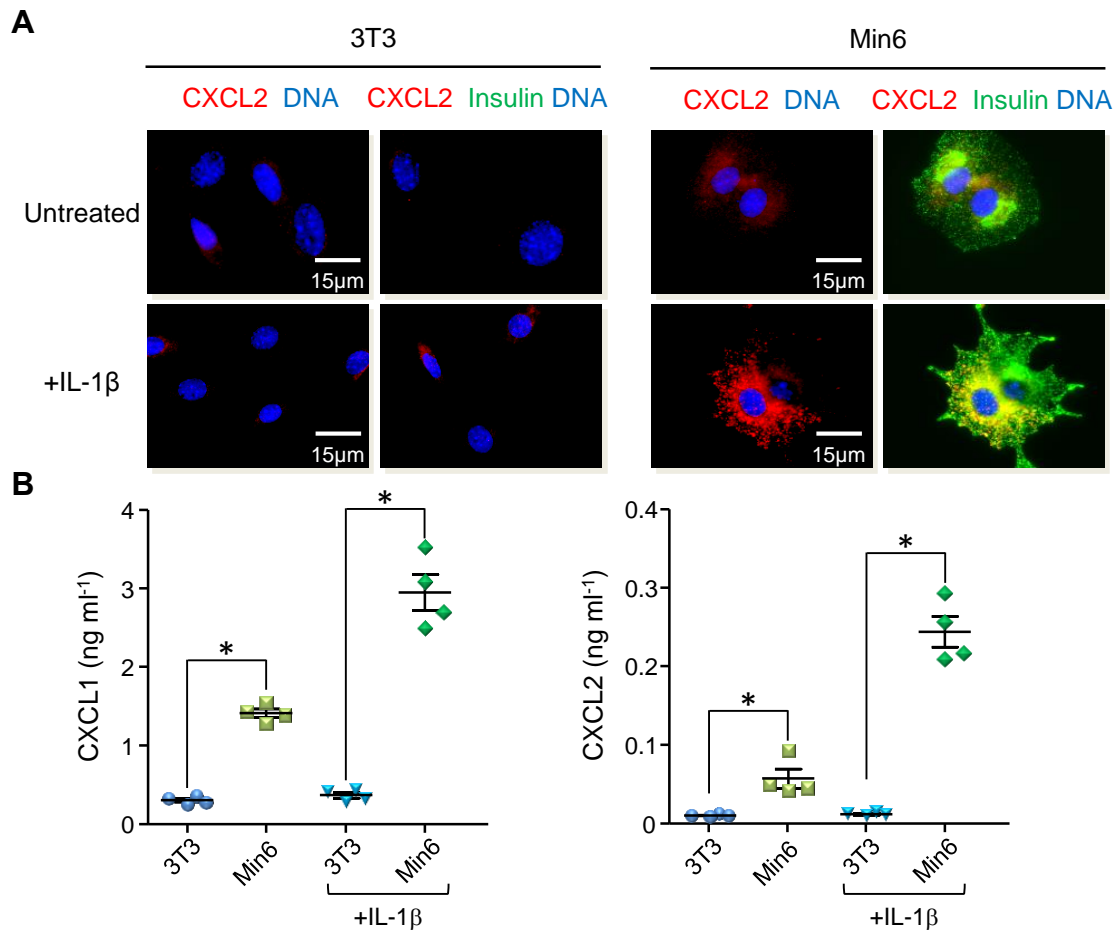

**Figure S8.  $\beta$ -cells produce CXCL1 and CXCL2 under inflammatory conditions in vitro.** (a, b) 3T3 fibroblasts and Min-6  $\beta$  cells were cultured in absence or presence of rIL-1 $\beta$  for 24h and then stained for the expression of CXCL2, insulin and DNA (a) and CXCL1 and CXCL2 productions were measured by ELISA in the culture supernatants (b). Data are mean values  $\pm$  SEM (scatter plot) (b) or are representative (a) from four independent experiments. \*:  $P < 0.05$  comparing group as indicated.
