# Supplementary material for: Macrophages and β-cells are responsible for CXCR2-mediated neutrophil infiltration of the pancreas during autoimmune diabetes
Source: PubMed Central journal article supplement (PMC4154135; doi:10.15252/emmm.201404144), 2014-06-26
Supplement: emmm0006-1090-sd10.pdf [file emmm0006-1090-sd10.pdf]

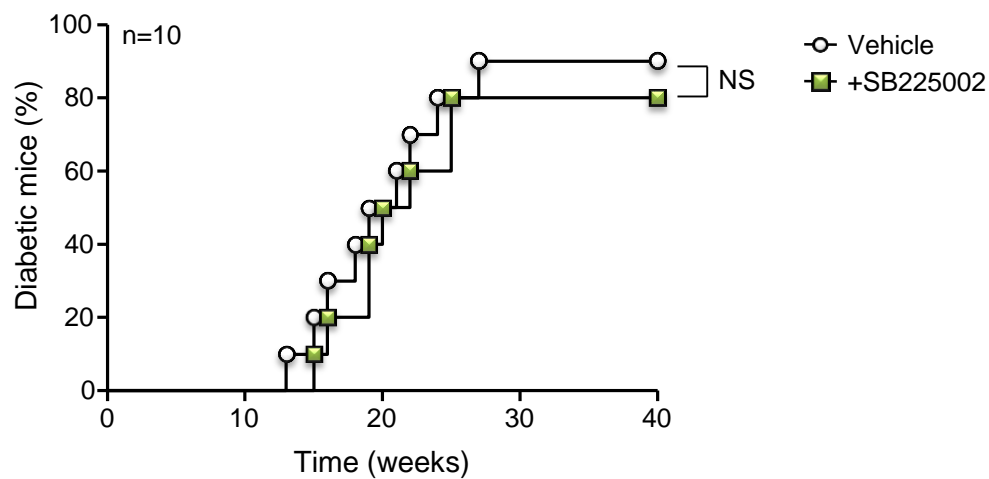

**Figure S10. CXCR2 blockage in prediabetic NOD mice does not affect diabetes development.**

Female NOD mice were treated with SB225002 or vehicle between 8-10 weeks of age (4 injections) and incidence of diabetes was followed. NS: not significant difference, n=10 mice/group.
