# Supplementary material for: Macrophages and β-cells are responsible for CXCR2-mediated neutrophil infiltration of the pancreas during autoimmune diabetes
Source: PubMed Central journal article supplement (PMC4154135; doi:10.15252/emmm.201404144), 2014-06-26
Supplement: emmm0006-1090-sd11.pdf [file emmm0006-1090-sd11.pdf]

| Chemoattractant                                      | Treatment     | Median cell count +/- interquartile | n experiment |
|------------------------------------------------------|---------------|-------------------------------------|--------------|
| Medium                                               | -             | 2 485 +/- 369                       | 6            |
| rmCXCL2 (10ng mL <sup>-1</sup> )                     | -             | 6 284 +/- 546                       | 2            |
| rmCXCL2 (100ng mL <sup>-1</sup> )                    | -             | 7 712 +/- 427                       | 2            |
| rmCXCL2 (1000ng mL <sup>-1</sup> )                   | -             | 10 125 +/- 920                      | 6            |
| rmCXCL2 (1000ng mL <sup>-1</sup> )                   | SB225002      | 2 224 +/- 684                       | 6            |
| 3-wk-old NOD islet SUP                               | -             | 11 234 +/- 1 284                    | 6            |
| 3-wk-old NOD islet SUP                               | SB225002      | 2 796 +/- 386                       | 6            |
| 3-wk-old NOD islet SUP                               | aCXCL1        | 6 387 +/- 736                       | 6            |
| 3-wk-old NOD islet SUP                               | aCXCL2        | 5 726 +/- 547                       | 6            |
| 3-wk-old NOD islet SUP                               | aCXCL1+aCXCL2 | 2 932 +/- 429                       | 6            |
| 3-wk-old NOD islet SUP                               | IgG           | 9 928 +/- 341                       | 6            |
| 3-wk-old NOD islet SUP                               | WRW4          | 9 482 +/- 981                       | 6            |
| 6-wk-old NOD islet SUP                               | -             | 4 916 +/- 1 268                     | 4            |
| 3-wk-old C57BL/6 islet SUP                           | -             | 2 365 +/- 586                       | 4            |
| 3-wk-old BALB/c islet SUP                            | -             | 2 472 +/- 750                       | 4            |
| $\alpha$ IL1 $\beta$ -treated 3-wk-old NOD islet SUP | -             | 4 983 +/- 1 965                     | 4            |

**Table S1. Absolute number of migrating neutrophils recovered in *in vitro* migration assays.**

Migration assays were performed using 24-well microchemotaxis chambers and 5- $\mu$ m PVP-free polycarbonate filter. 10e5 sorted blood-neutrophils were added to the upper compartment and 4h latter migrating cells were counted. Data are median +/- interquartile range from two to six independent experiments each performed in duplicate.
